# Supplementary material for: A medullary centre for lapping in mice
Source: PubMed Central journal article supplement (PMC8563905; doi:10.1038/s41467-021-26275-y), 2021-11-02
Supplement: 41467_2021_26275_MOESM1_ESM.pdf [file 41467_2021_26275_MOESM1_ESM.pdf]

## Supplementary figures

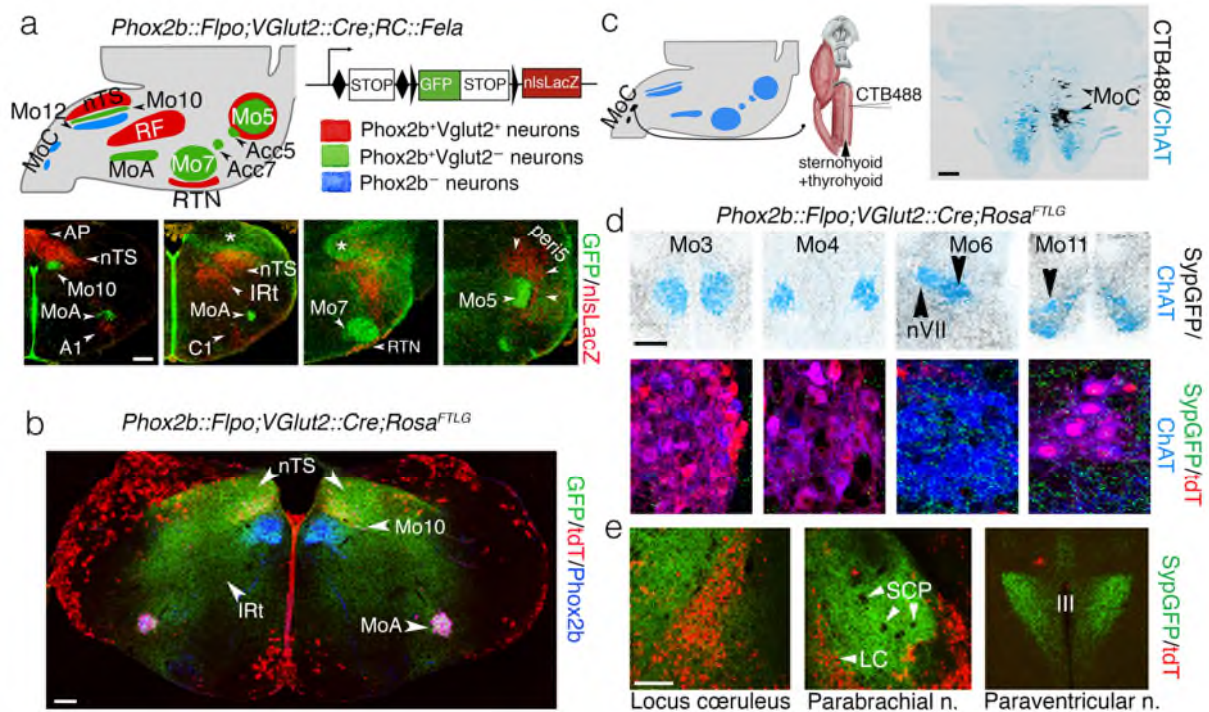

**Supplementary Fig. 1.** (a) (Upper) Strategy for transgenic labeling of glutamatergic *Phox2b*<sup>+</sup> interneurons using the *FEL1A* transgene, and summary of the results. (Lower) Coronal sections through the pons and medulla of a *vGlut2::Cre;Phox2b::Flpo;RC::Fela* embryo at E17.5. Branchiomotor and visceromotor neurons (cholinergic and *Phox2b*<sup>+</sup>) express GFP (green), while interneurons that are glutamatergic and *Phox2b*<sup>+</sup> express *nlsLacZ* (red). The dorsal aspect of the hindbrain harbors numerous *GFP*<sup>+</sup> astrocytes (asterisks), likely born from *Phox2b*<sup>+</sup> progenitors, in p3/pMNv (12)(13) or possibly dB2. (b) Coronal section through the medulla of a *vGlut2::Cre;Phox2b::Flpo;Rosa<sup>FTLG</sup>* embryo at E17.5, showing that branchial and visceral neurons have retained tdT expression (since they undergo recombination by *Flpo* alone), while glutamatergic *Phox2b*<sup>+</sup> neurons in the nTS or IRt have lost tdT, to gain *Syp-GFP* expression after dual *Cre* and *Flpo* recombination. *Syp-GFP* marks fields of synaptic boutons in discrete areas of the medulla. (c) (left) Strategy for labeling the motor nucleus for the infrahyoid muscles (sternohyoid and thyrohyoid) (MoC), by retrograde transport of CTB. (right) transverse section at the spinal-medulla junction showing two islands of labelled motoneurons (black). (d) Motor nuclei for extraocular muscles (Mo3, Mo4 and Mo6) and for the trapezius and sternocleidomastoid (Mo11), do not

receive labelled boutons in a *vGlut2::Cre;Pbox2b::Flpo;Rosa<sup>FTLG</sup>* background at P8. **(E)** Known sites of projection from *Pbox2b<sup>+</sup>* glutamatergic interneurons (including C1 neurons and the nTS) are covered by *GFP<sup>+</sup>* boutons: the parabrachial nucleus (14), the locus coeruleus and the paraventricular nucleus of the hypothalamus (15). LC, locus coeruleus; SCP, superior cerebellar peduncle; III, third ventricle. Scale bars, 200  $\mu\text{m}$ .

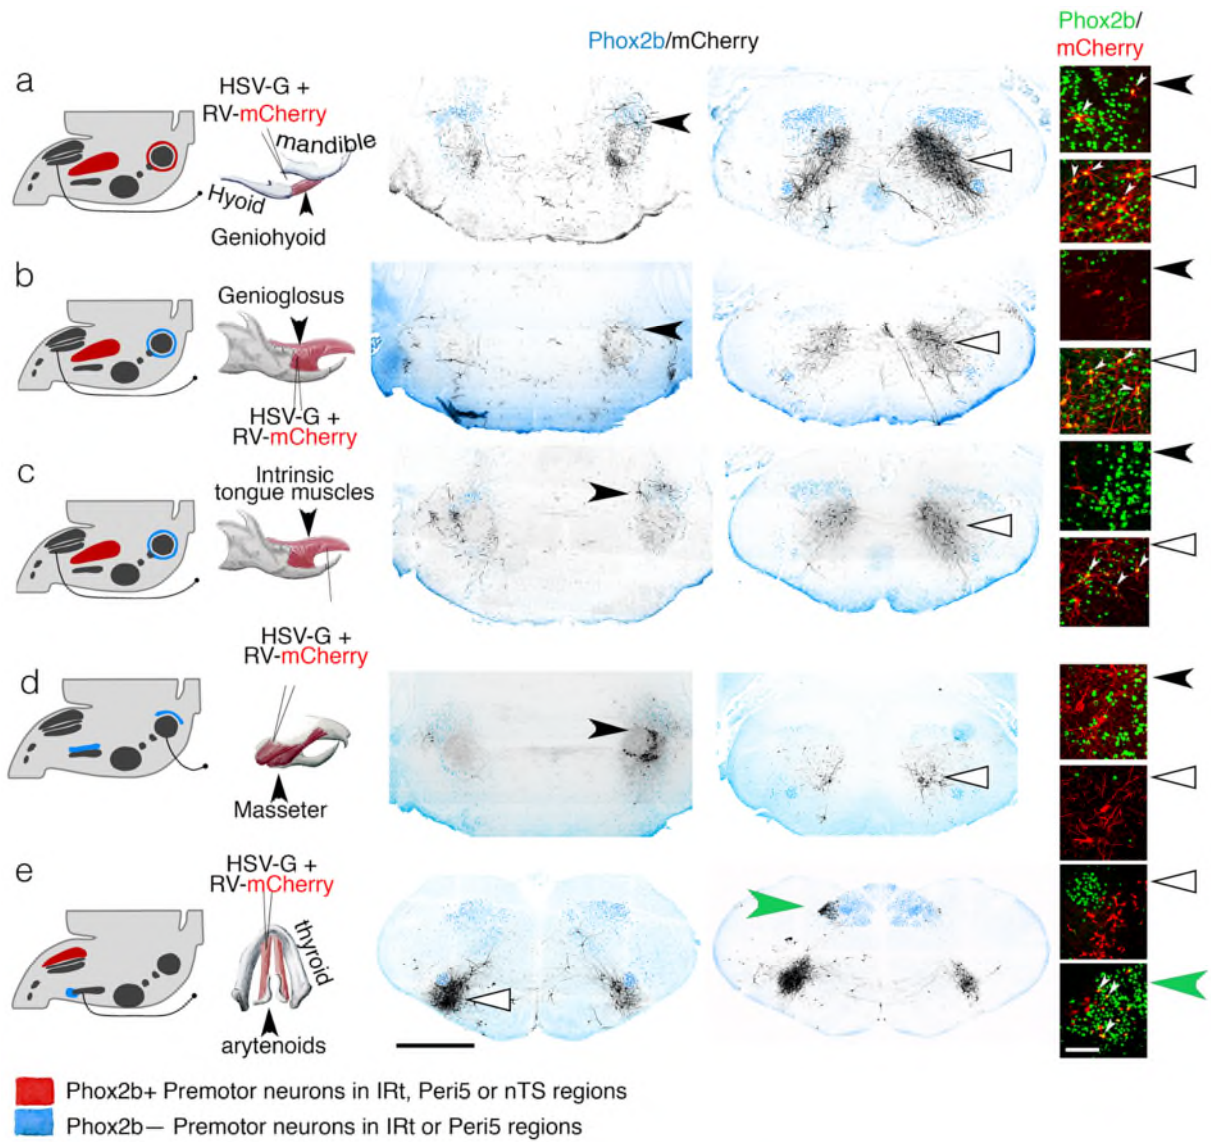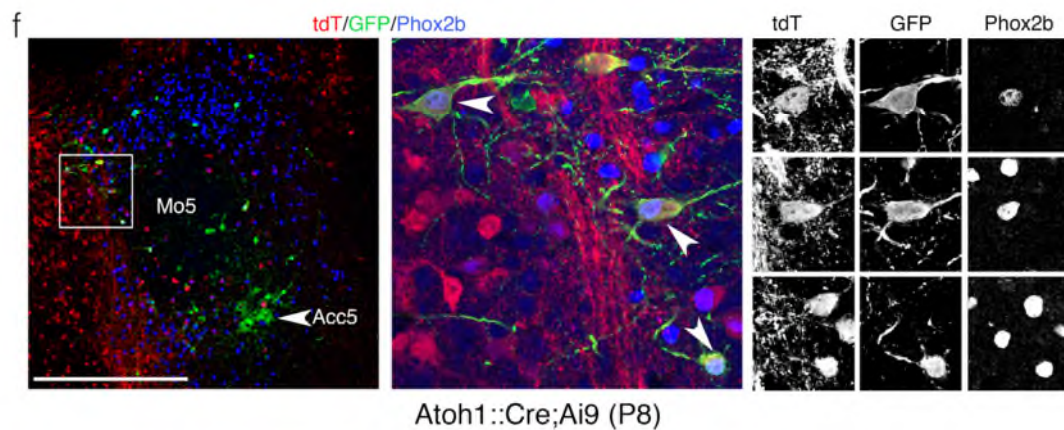

**Supplementary Fig. 2.** Retrograde monosynaptic labeling of the premotor neurons for the geniohyoid (a), genioglossus (b), intrinsic tongue muscles (c), masseter (d) and thyro-arytenoid (E). (Left column) Labeling strategy and summary of the results. (Middle column) Sections through the pons at the level of Mo5 (a-d, left), or at the level of the IRT (a-d, right, and e, left and right) showing the filled premotor neurons (black) on the landscape of Phox2b+ neurons (blue). (Right column) Close ups of filled premotor neurons (red) either expressing *Phox2b* (green nuclei), or not.

The thyro-arytenoid and masseter have no *Phox2b*<sup>+</sup> premotor neurons in the IRt or Peri5. **(f)** Coronal section through the peri5 region of a Cre-reporter *Ai9* mouse crossed with *Atob1::Cre*, whose posterior digastric muscle was co-injected with a DG-rabies virus encoding GFP and a helper HSV-G, counter-stained for *Phox2b*, at 3 magnifications from left to right. Three triple-labeled neurons are highlighted, which thus have a history of both *Atob1* and *Phox2b* expression, and are premotor to the posterior digastric. Scale bar, **(a-e)**, 1 mm (**insets**, 150  $\mu\text{m}$ ); **(f)**, 500 $\mu\text{m}$ .



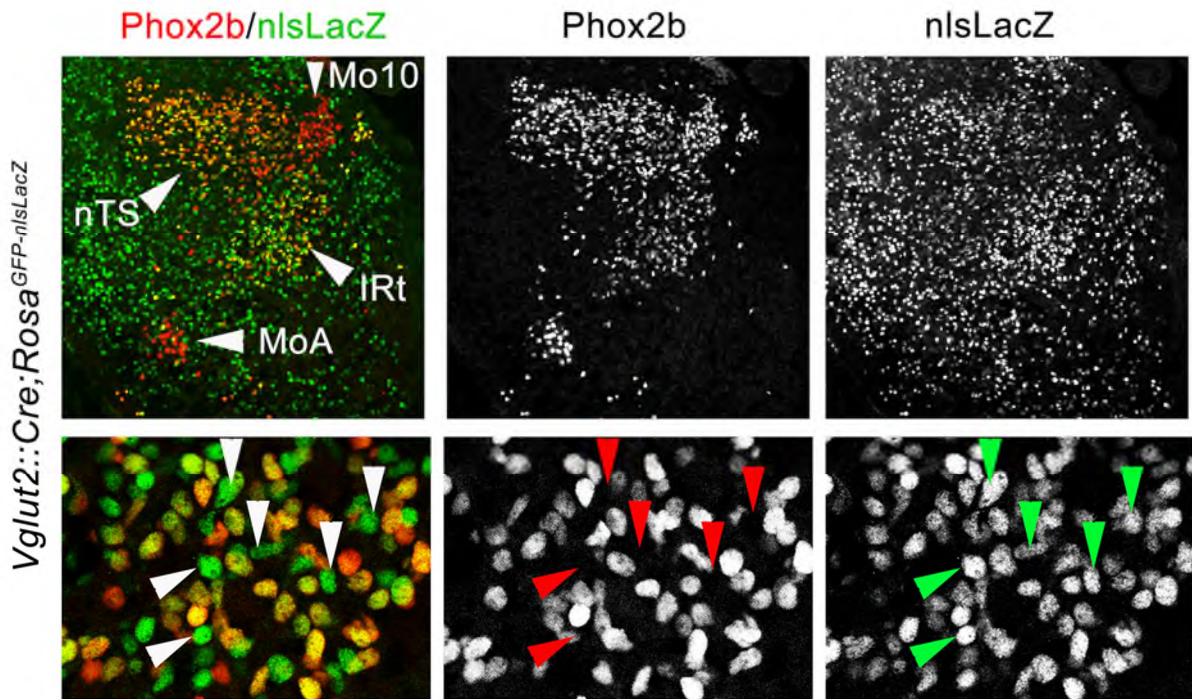

**Supplementary Fig. 3.** Double immunofluorescence for *Phox2b* and *nlsLacZ* in a transverse section through the hindbrain of a *Vglut2::Cre;Rosa<sup>GFP-nlsLacZ</sup>* pup at P0 showing that in  $IRT^{Phox2b}$  (shown at low magnification in upper panels — marked IRT in upper right panel — and at high magnification in lower panels) glutamatergic (*nlsLacZ*<sup>+</sup>) *Phox2b*<sup>+</sup> neurons (yellow cells) are intermingled with other glutamatergic (*nlsLacZ*<sup>+</sup>) *Phox2b*-negative neurons (green cells, marked by arrowheads in lower panels). In contrast, the overwhelming majority glutamatergic neurons in nTS are *Phox2b*<sup>+</sup>.

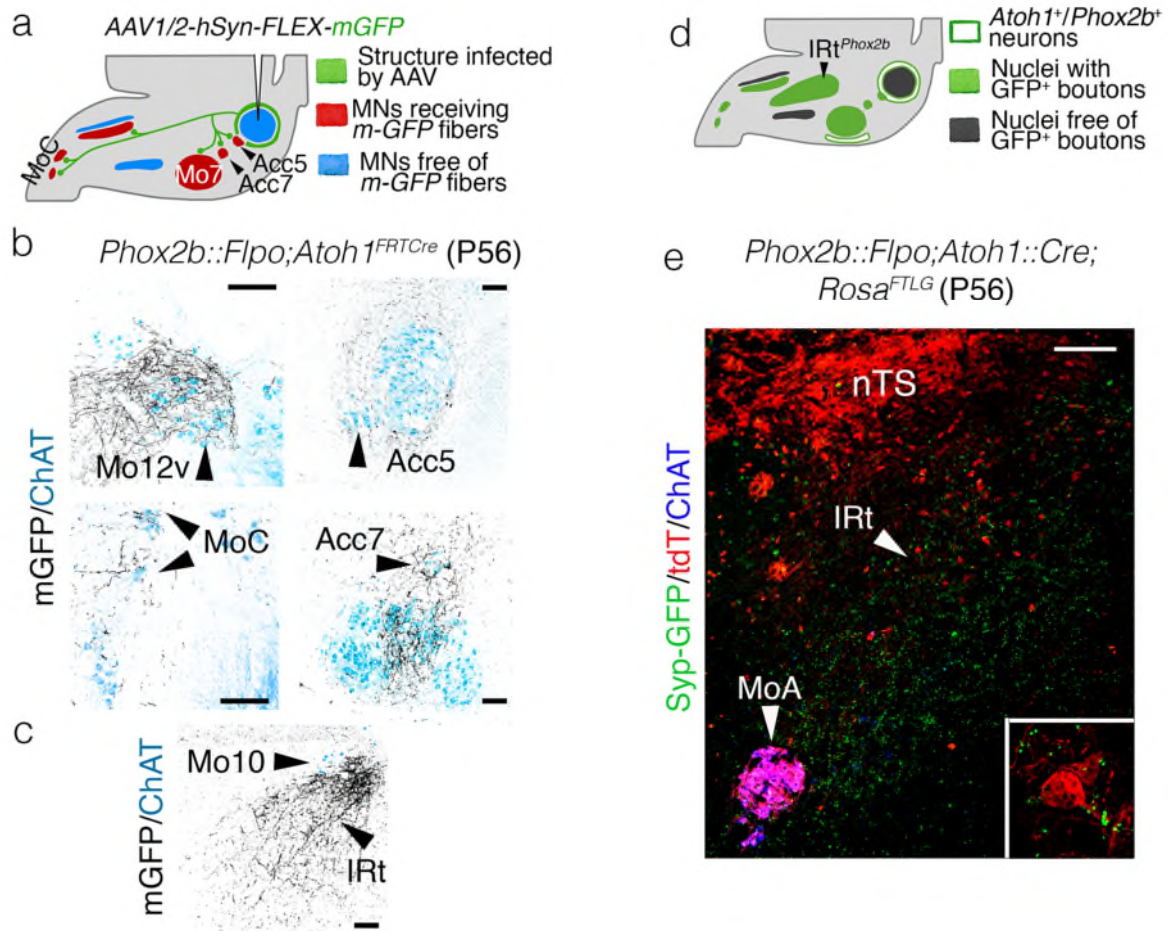

**Supplementary Fig. 4.** (a): Strategy for viral tracing the projections of Peri5<sup>Atoh1</sup> and summary of the results. (b): Coronal sections through the motor nuclei (ChAT<sup>+</sup>, blue) that receive projections from Peri5<sup>Atoh1</sup>, labelled with *mGFP* encoded by the AAV anterograde virus (black). (c): Coronal sections through the medulla showing *mGFP*-labeled fibers in the IRt. (d): Strategy for transgenic labeling projections from *Atoh1<sup>+</sup>/Phox2b<sup>+</sup>* cells (Peri5<sup>Atoh1</sup> and RTN) using the *Rosa<sup>FTLG</sup>* transgene and summary of the results already visible in Fig 3A. (e) Projections from Peri5<sup>Atoh1</sup> + RTN on IRt<sup>Phox2b</sup> at intermediate and high (inset) magnifications. Scale bars (b-e) 200  $\mu$ m.

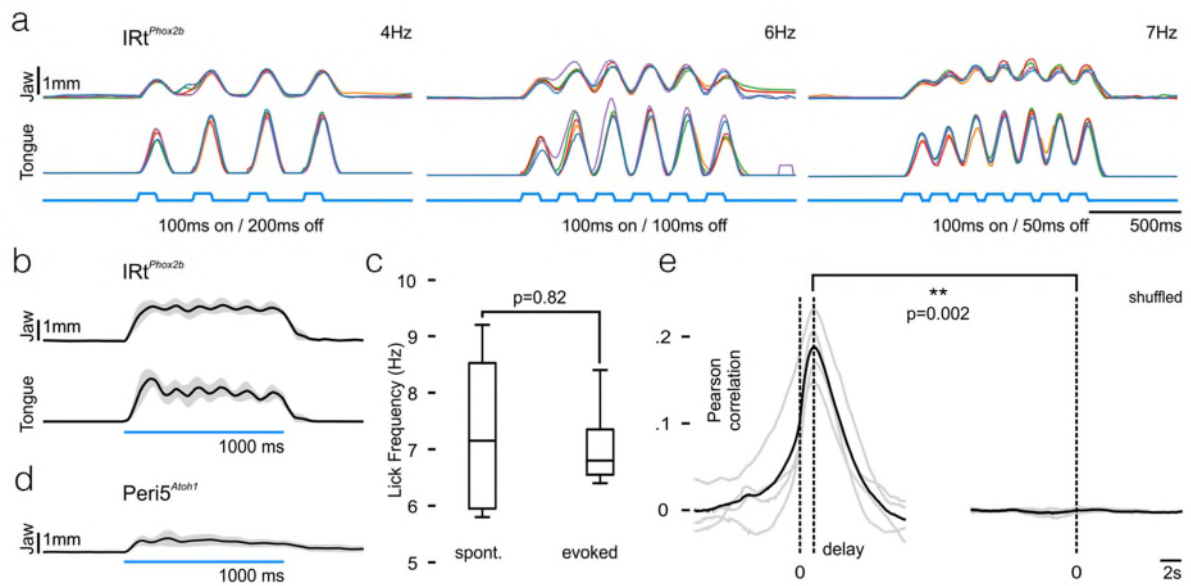

**Supplementary Fig. 5.** (a) Example of tracked jaw and tongue position on the Y axis upon stimulation of IRT<sup>Phox2b</sup> with 1000ms long trains of 100ms pulses at 4Hz (33% duty cycle), 6Hz (50% duty cycle) and 7Hz (67% duty cycle) over multiple trials (n=5). (b) Grand average of tracked position of jaw and tongue on the Y axis upon 1000 ms stimulation of IRT<sup>Phox2b</sup> (n=4 mice, 34 trials). (c) Box plot of spontaneous (mean=7.3 Hz  $\pm$  0.8 SEM, median=7.2, Q1-Q3 =6-8.5, whiskers=9.2-5.8) (n=4 mice) and evoked licking frequency (mean=7.1 Hz  $\pm$  0.4 SEM, median=6.8, Q1-Q3=6.6-7.4, whiskers=6.4-8.4) (n=4 mice). No significant difference between evoked and spontaneous frequency (p=.82, y a two-sided paired t-test, confidence interval 95%). (d) Grand average (n=4 mice, 21 trials) of tracked position of the tongue on the Y axis upon 1000 ms stimulation of Peri5<sup>Atah1</sup>. (e) (left) Mean shifted correlation curves displayed for photometry recordings of IRT<sup>Phox2b</sup> during volitional licking from individual animal (n=4, gray) and the overall mean (black), displaying a 1.3s delay between lick port contact and maximum correlation; (right) same computation on the same data but with the lick port signal shuffled, p=.002 (two-sided paired t-test, confidence interval 95%).

**Supplementary Table 1.** Primer sequences for genotyping and probe synthesis

|                                                |                                                                                                                                                                                                                                |
|------------------------------------------------|--------------------------------------------------------------------------------------------------------------------------------------------------------------------------------------------------------------------------------|
| <i>Phox2b</i> :: <i>Flo</i>                    | Forward 5'-GAG CTT CGA CAT CGT GAA CA-3'<br>Reverse 5'-ACA GGG TCT TGG TCT TGG TG-3'                                                                                                                                           |
| <i>Phox2b</i> :: <i>Cre</i>                    | Forward 5'-GGC CGG TCA TTT TTA TGA TC-3'<br>Reverse 5'-GAA ATC AGT GCG TTC GAA CGC TAG                                                                                                                                         |
| <i>Vglut2</i> :: <i>Cre</i>                    | Forward 5'-TGA TGG ACA TGT TCA GGG ATC-3'<br>Reverse 5'-GAA ATC AGT GCG TTC GAA CGC TAG-3'                                                                                                                                     |
| <i>Atob1</i> :: <i>FRTCre</i>                  | Forward 5'-GCT GAT CCG GAA CCC TTA AT-3'<br>Reverse 5'-AGG AAC TGC TTC CTT CAC GA-3'                                                                                                                                           |
| <i>ATOH1</i> :: <i>CRE</i>                     | Forward 5'-TGA TGG ACA TGT TCA GGG ATC-3'<br>Reverse 5'-GAA ATC AGT GCG TTC GAA CGC TAG-3'                                                                                                                                     |
| <i>FoxG1</i> <sup><i>iresCre</i></sup>         | WT Forward 5'-TAG TGA AAC AGG GGC AAT GG-3'<br>Mut Forward 5'-ACC CTG CCC TGT GAG TCT T-3'<br>Reverse 5'-TTC TCC CAC ATT GCA CCT C-3'                                                                                          |
| <i>Olig3</i> :: <i>Cre<sup>fl2</sup></i>       | Forward 5'-TGA TGG ACA TGT TCA GGG ATC-3'<br>Reverse 5'-GAA ATC AGT GCG TTC GAA CGC TAG-3'                                                                                                                                     |
| <i>Tau</i> :: <i>Syp</i> <sup><i>GFP</i></sup> | LacZ Forward 5'-AGT TCA CCC GTG CAC CGC-3'<br>LacZ Reverse 5'-CGC TCG GGA AGA CGT ACG-3'<br>Tau WT Forward 5'-ATG CGG TAC CTC TTT GGT GCT GTCC CTG C-3'<br>TAU WT Reverse 5'-CAG ACT GTG CTC CAC TGT G-3'                      |
| <i>RC</i> :: <i>FELA</i>                       | LacZ Forward 5'-AGT TCA CCC GTG CAC CGC-3'<br>LacZ Reverse 5'-CGC TCG GGA AGA CGT ACG-3'                                                                                                                                       |
| <i>ROSA26</i> <i>AI 9</i>                      | IMR9020-WT - Forward 5'-AAG GGA GCT GCA GTG GAG TA-3'<br>IMR9021-WT- Reverse 5'-CCG AAA ATC TGT GGG AAG TC-3'<br>IMR9103-MUT - Reverse 5'-GGC ATT AAA GCA GCG TAT CC3'<br>IMR9105-MUT- Forward 5'-CTG TTC CTG TAC GGC ATG G-3' |
| <i>Atob1</i> probe                             | Forward 5'-CGATTTT <del>AGGTGACACTATAGAAATCAACGCTCTGT</del> CGGAGTT-3'<br>Reverse 5'-CTAATACGACTCACTATAGGGACAGAGGAAGGGGATTGGAAGAG -3'                                                                                          |
| <i>Cited1</i> probe                            | Forward 5'-TGGGGGGGCTTAAGAGCCCGG-3'<br>Reverse 5'-AGGTGAGGGGTAGGATGCAG-3                                                                                                                                                       |
