# Supplementary material for: A medullary centre for lapping in mice
Source: PubMed Central journal article supplement (PMC8563905; doi:10.1038/s41467-021-26275-y), 2021-11-02
Supplement: 41467_2021_26275_MOESM5_ESM.pdf [file 41467_2021_26275_MOESM5_ESM.pdf]

**Title: Supplementary Movie 1**

**Description:** Stimulation (1000 ms) of  $IRt^{Phox2b}$ . Displayed at  $\frac{1}{4}$  speed.

**Title: Supplementary Movie 2**

**Description:** Stimulation (1000 ms) of  $Peri5^{Atob1}$ . Displayed at  $\frac{1}{4}$  speed

**Title: Supplementary Movie 3**

**Description:** Activity of  $IRt^{Phox2b}$  during a spontaneous licking bout. Displayed at  $\frac{1}{4}$  speed.
